# Supplementary material for: Identification of Anhydrodebromoaplysiatoxin as a Dichotomic Autophagy Inhibitor
Source: MDPI journal article supplement (doi:10.3390/md21010046), 2023-01-10
Supplement: s1 [file s1]

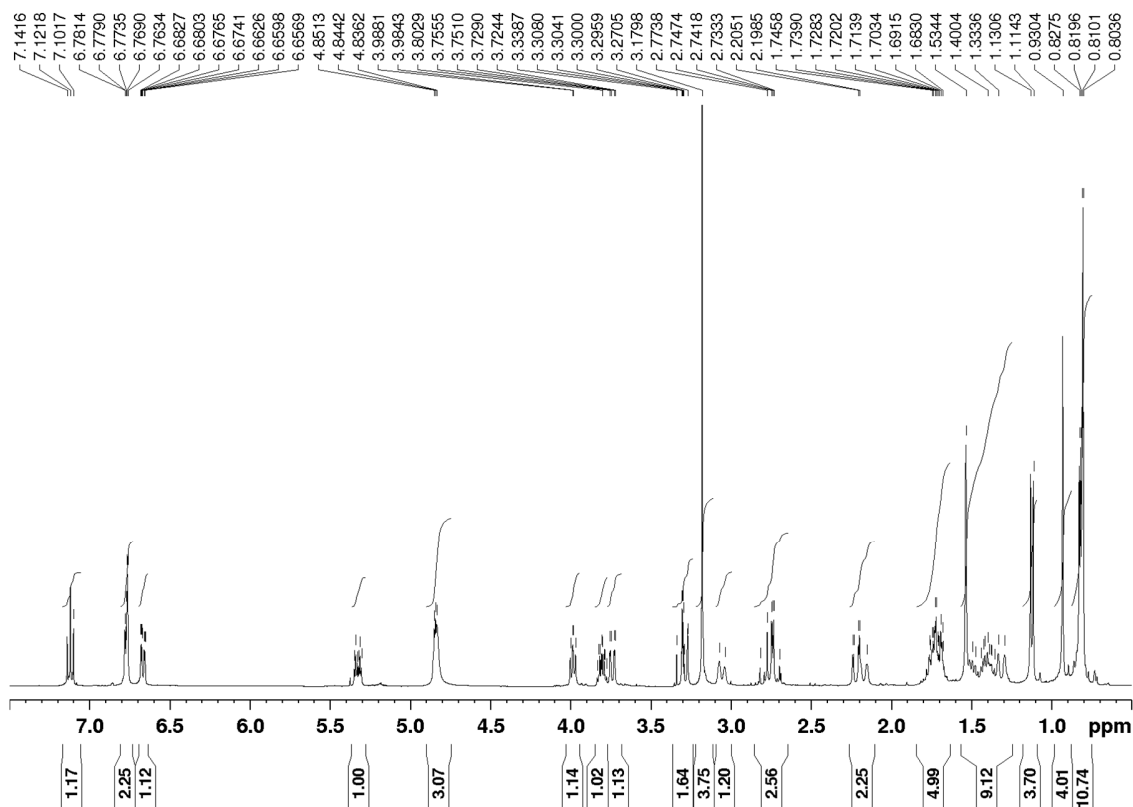

Figure S1:  $^1\text{H}$  spectrum of anhydrodebromoaplysiatoxin

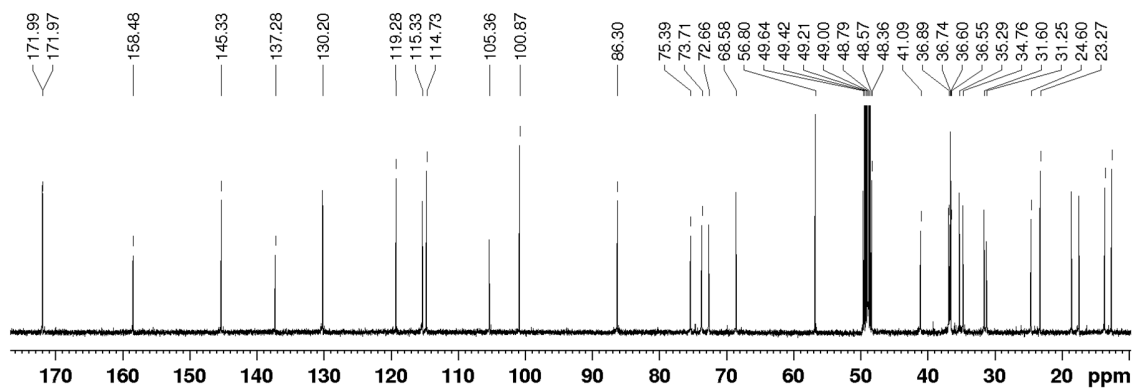

Figure S2:  $^{13}\text{C}$  NMR spectrum of anhydrodebromoaplysiatoxin
